# Supplementary material for: Doxorubicin Induces Bone Loss by Increasing Autophagy through a Mitochondrial ROS/TRPML1/TFEB Axis in Osteoclasts
Source: MDPI journal article supplement (doi:10.3390/antiox11081476), 2022-07-28
Supplement: s1 [file s1]

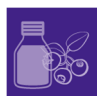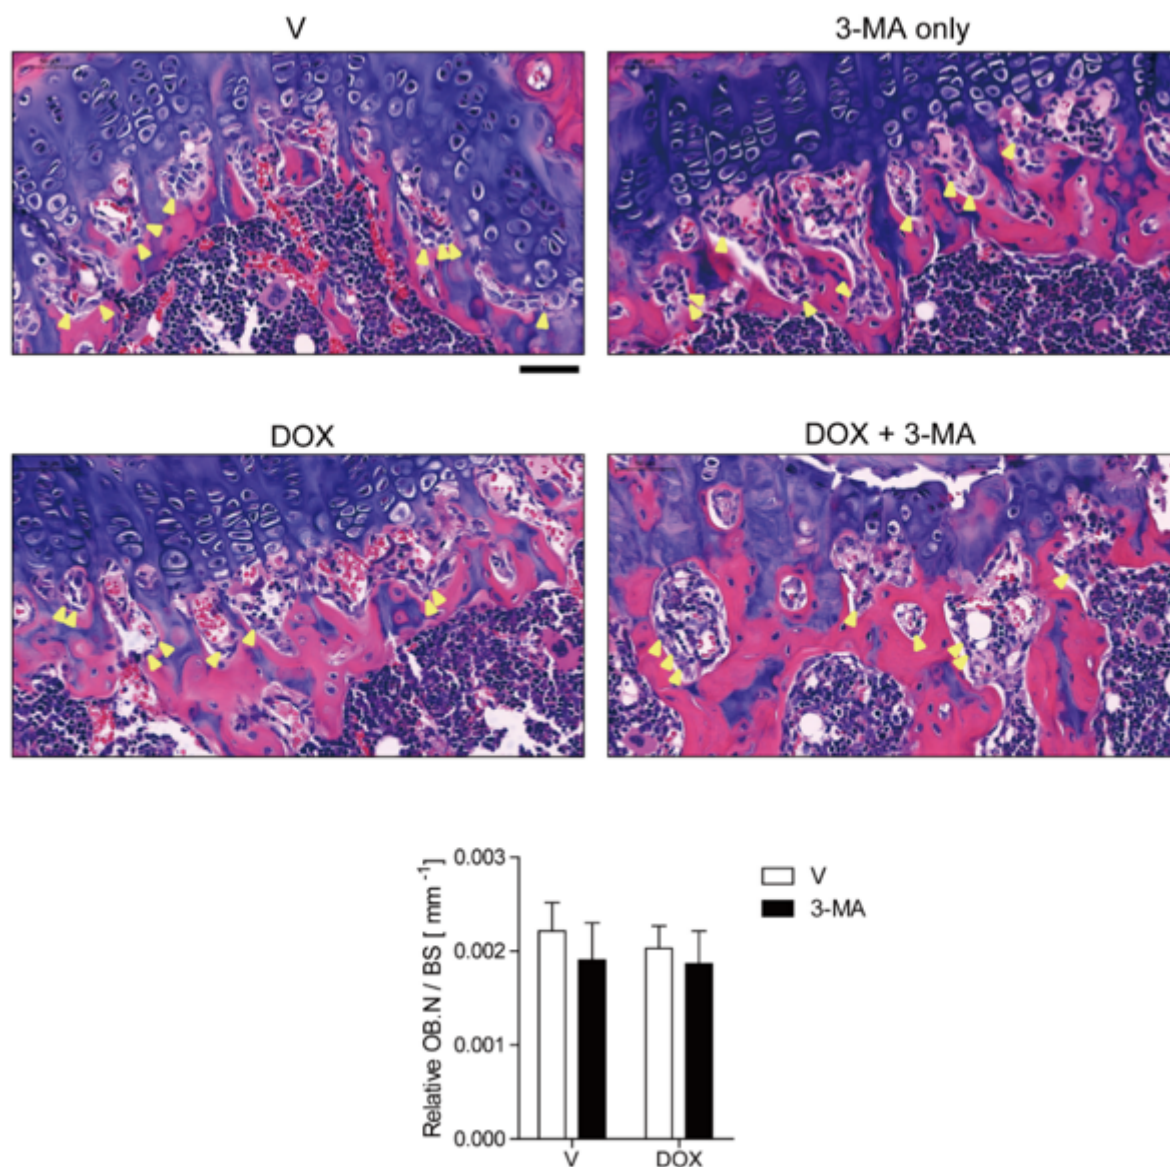

**Supplementary Figure S1.** Representative images of hematoxylin and eosin (H&E) staining in distal femora from each of the four groups. Osteoblasts (OBs) that have diffused chromatin compared with other cells are indicated by the arrow-heads and the relative OB.N/BS ratio (relative OB number divided by total bone surface) was calculated. Scale bar = 50  $\mu$ m.
